# Supplementary material for: BARE Retrotransposons Are Translated and Replicated via Distinct RNA Pools
Source: PubMed Central journal article supplement (PMC3735527; doi:10.1371/journal.pone.0072270), 2013-08-06
Supplement: pone.0072270.s002.pdf [file pone.0072270.s002.pdf]

Table S1. Primer list.

| Primer    | Sequence                                      | Matching region in <i>BARE1</i> <sup>1</sup> | Amplifies from <i>BARE1</i> or <i>BARE2</i> | Orientation |
|-----------|-----------------------------------------------|----------------------------------------------|---------------------------------------------|-------------|
| LS1       | CTGCCTCGCCC <u>ACCGGACTTGAGCTAGTGG AATTGG</u> | 3234-3258                                    | 1, 2                                        | F           |
| AP4       | CTGGTTCGGCCCACCAGATATAATGTTTCATGCT(TC)AACGC   | 4508-4486                                    | 1, 2                                        | R           |
| 1965      | GCGAATTACGATGTAGCTTGC                         | 6624-6644 <sup>2</sup>                       | 2                                           | F           |
| 1966      | GTCTCTTCATTAGTGCAGCAACTG                      | 7355-7332 <sup>2</sup>                       | 2                                           | R           |
| gag5      | AAACTGCAG(A/G)TGTTGTAGAT(T/C)AATGGCTC(A/G)CG  | 3380-3401                                    | 1                                           | F           |
| F1593     | GCGCTATCATTGTTAACTCTAACTC                     | 4697-4672                                    | 1                                           | R           |
| F1594     | GCTGATAAGAAGGCGGCCAA                          | 4202-4221                                    | 1                                           | F           |
| 81567     | GACATAAGCATCGGATCCTCAAACCTTAAAG               | 5387-5360                                    | 1, 2                                        | R           |
| UncapTA1  | AGCCCACTAAGGGCTGGTGTG                         | 1453-1433                                    | 1                                           | R           |
| E1625     | ACGACACCTCCGCGTTCAGC                          | 1908-1889                                    | 1                                           | R           |
| PBS       | CTACGCATGAACCTAGCTCATGATGCC                   | 2166-2140                                    | 1, 2                                        | R           |
| ATGA      | CTGGTTGGCCCACG(CT)GAGCCATT(GA)ATCTACAACA(CT)A | 3401-3377                                    | 1                                           | R           |
| RLM1      | CGCAGGGTCTGCACACTTAAGGTTCT                    | 1153-1177                                    | 1, 2                                        | F           |
| RLM2      | GTTGGTTACCGAATGTTGTTCCGGAGTC                  | 1209-1235                                    | 1, 2                                        | F           |
| 5' RACE   | GCTGATGGCGATGAATGAACACTG                      | N/A <sup>3</sup>                             | 1, 2                                        | F           |
| E2146     | ACTCTGCGTTGTTACCACTGCTT                       | N/A <sup>4</sup>                             | 1, 2                                        | R           |
| E1820     | AAGCAGTGGTAACAACGCAGAGTACT <sub>30</sub> NA   | N/A <sup>5</sup>                             | 1, 2                                        |             |
| RNA oligo | GCUGAUGGCGAUGAAUGAACACUG                      | N/A <sup>6</sup>                             | 1, 2                                        |             |

<sup>1</sup> In accession Z17327

<sup>2</sup> Matching region in Accession AJ279072

<sup>3</sup> Matches RNA oligo, for RLM-RACE

<sup>4</sup> Matches primer E1820, for 3' end mapping

<sup>5</sup> For making cDNA from poly(A) RNA

<sup>6</sup> For RLM-RACE
